# Supplementary material for: Novel N-Substituted 2-(2-(Adamantan-1-yl)-1H-Indol-3-yl)-2-Oxoacetamide Derivatives: Synthesis and Biological Evaluation
Source: MDPI journal article supplement (doi:10.3390/molecules21050530), 2016-05-05
Supplement: s1 [file s1]

# Supplementary Materials: Novel *N*-Substituted 2-(2-(Adamantan-1-yl)-1*H*-Indol-3-yl)-2-Oxoacetamide Derivatives: Synthesis and Biological Evaluation

Hongyu Hu, Xudong Yu, Fei Wang, Chunrong Lin, Jinzhang Zeng, Yingkun Qiu, Meijuan Fang and Zhen Wu

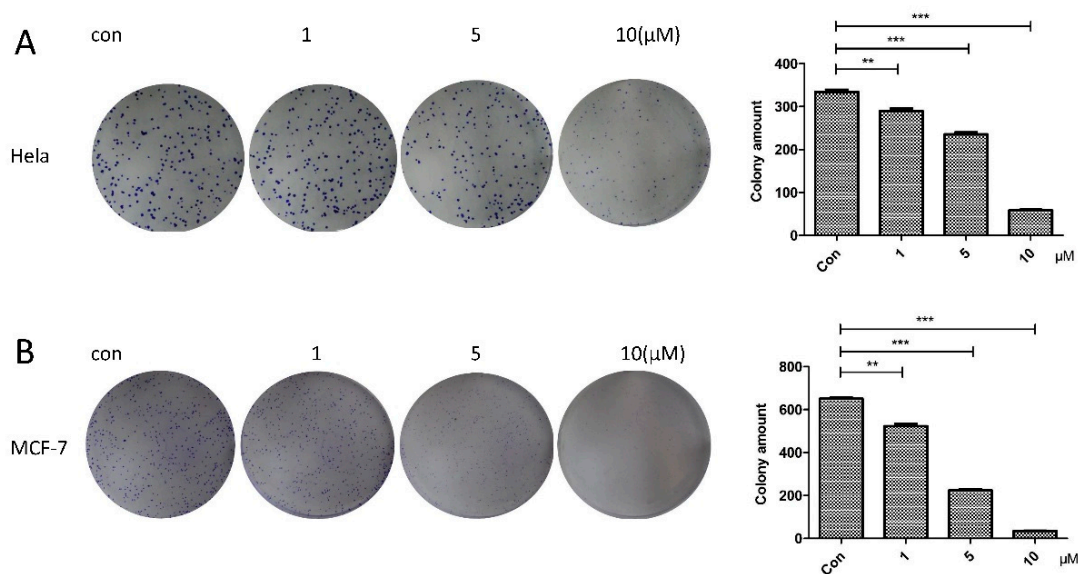

**Figure S1.** Effects of compound **5r** on colony-formation in HeLa (**A**) and MCF-7 (**B**) cells. Compound **5r** inhibits the colony-forming activity of HeLa and MCF-7 cells. Cells were grown in 6-well plates for 6 days and treated with compound **5r** (1, 5 and 10  $\mu$ M). Colonies of HeLa and MCF-7 cells decreased after compound **5r** treatment in a dose dependent manner (\*\*  $p < 0.01$  and \*\*\*  $p < 0.001$  compared with the control, *t*-test).

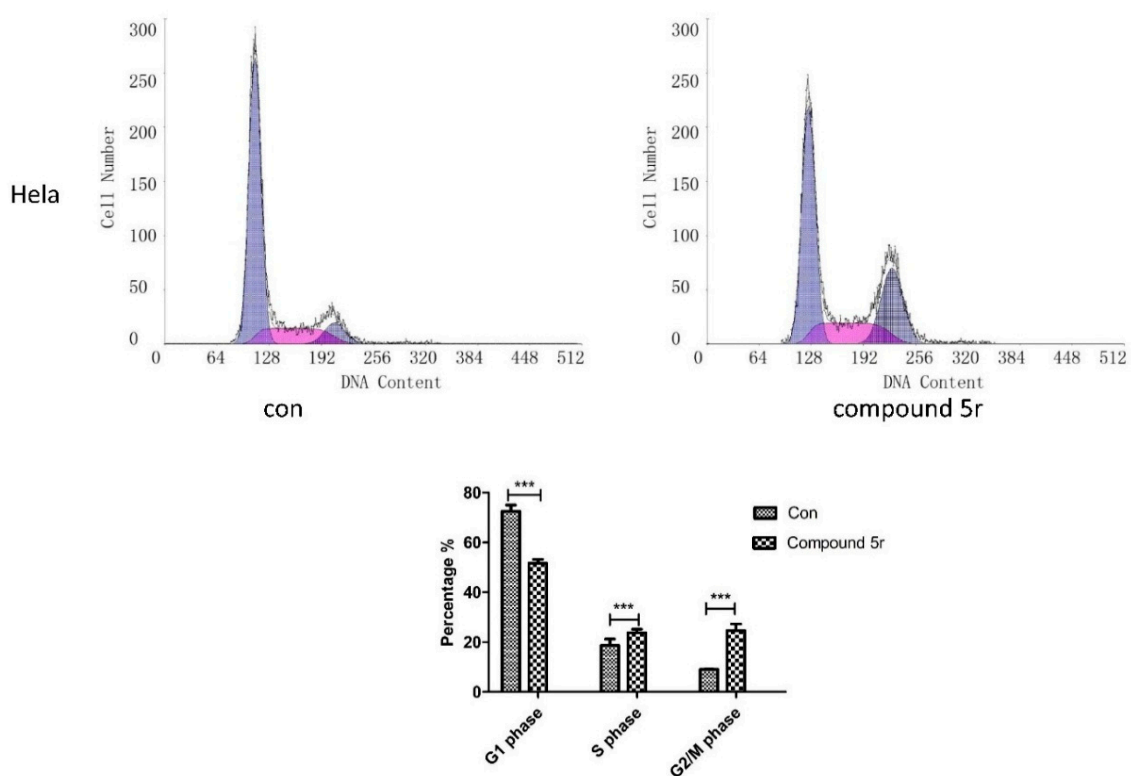

**Figure S2.** Effects of compound 5r on cell-cycle distribution in HeLa cells. A flow cytometry assay was performed to examine cell cycle arrest. HeLa cells were treated with 10  $\mu$ M compound 5r for 12 h. Compound 5r induced a significant accumulation of cell-cycle arrest (\*\* $p < 0.001$  compared with the control,  $t$ -test).

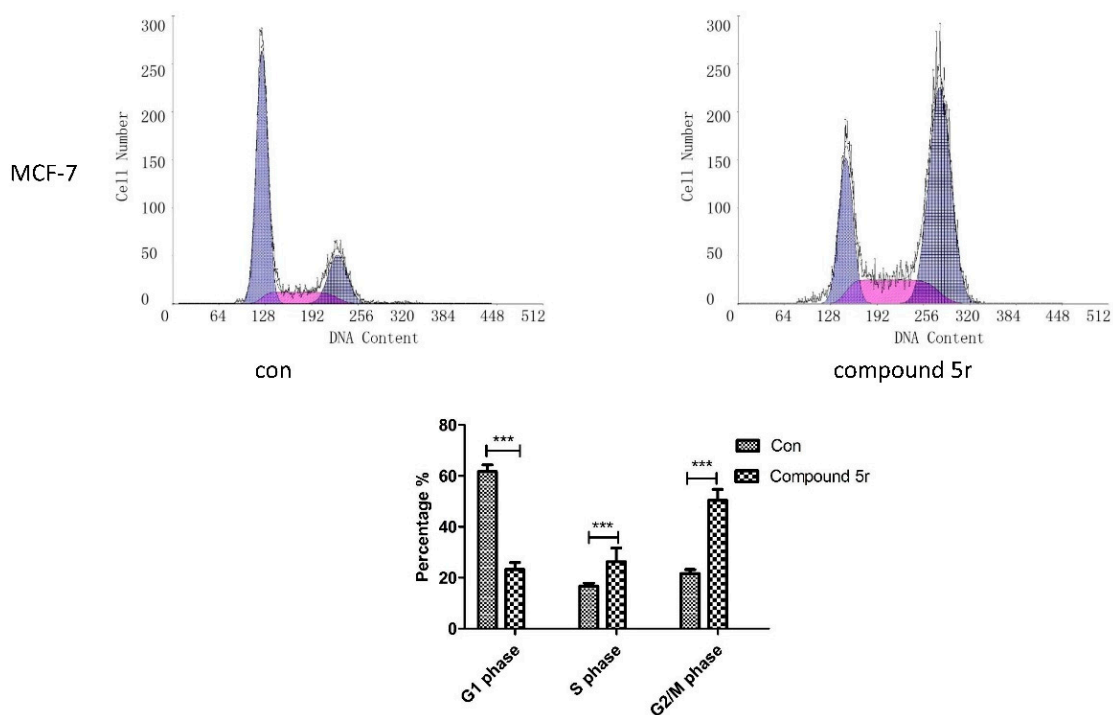

**Figure S3.** Effects of compound 5r on cell-cycle distribution in MCF-7 cells. A flow cytometry assay was performed to examine cell cycle arrest MCF-7 cells were treated with 10  $\mu$ M compound 5r for 12 h. Compound 5r induced a significant accumulation of cell-cycle arrest (\*\* $p < 0.001$  compared with the control,  $t$ -test).
